# Supplementary material
Source: PubMed Central journal article supplement (PMC3993711)
Supplement: JCM.00373-14_zjm999093306so1.pdf [file JCM.00373-14_zjm999093306so1.pdf]

## Supplementary Material

Hofko M et al., Detection of carbapenemases by real-time PCR and melt-curve analysis on the BD MAX™ System

### Supplementary Material and Methods

#### *Characterization of isolates by the German National Reference Laboratory*

Laboratories in Germany were asked to send isolates fulfilling the following criteria to the German National Reference Laboratory (NRL) for multidrug-resistant bacteria (Department of Medical Microbiology, Ruhr-University Bochum): (a) Enterobacteriaceae with elevated MICs for ertapenem (MIC $\geq$ 0.5 mg/l), meropenem or imipenem (MIC $\geq$ 2 mg/l) or decreased inhibition zone diameters ( $\leq$ 22 mm for imipenem or meropenem or  $\leq$ 25 mm for ertapenem) with the exception of *Proteus* spp., *Morganella morganii* and *Providencia* spp. with elevated MIC or decreased inhibition zone solely for imipenem and a meropenem MICs of  $\leq$ 0.25 mg/l. (b) *Pseudomonas aeruginosa* with resistance to imipenem, meropenem and ceftazidime. (c) *Acinetobacter baumannii* with resistance to imipenem and meropenem. Several phenotypic tests were performed routinely: the modified Hodge Test (1), the combined disk test with EDTA (2) and the combined disk test with boronic acid (3, 4) (Enterobacteriaceae only). In addition, the following PCRs followed by sequencing were performed routinely: bla<sub>KPC</sub> (5) (Enterobacteriaceae and *P. aeruginosa* only), bla<sub>GES</sub> (6) (*P. aeruginosa* only), bla<sub>OXA-48</sub> (7) (Enterobacteriaceae only), bla<sub>OXA-23/-24/-58</sub> (8) (*Acinetobacter* spp. only), bla<sub>VIM</sub> (2), bla<sub>IMP</sub> (2) and bla<sub>NDM</sub> (9). If the phenotypic tests suggested the presence of a carbapenemase further PCRs for rarely occurring carbapenemases were performed. If negative, a microbiological bioassay was performed similar as described previously (10).

#### *Collections of isolates*

Two different collections from the National Reference laboratory were investigated in our study. (i), 129 isolates were selected. 89 had defined carbapenemase resistance genes, 40 were negative for carbapenemases. The positive strains comprised the following carbapenemase genes (details in Table S2): bla<sub>KPC</sub> type (n=12), bla<sub>GES</sub> type (n=4), bla<sub>NDM</sub> type (n=12), bla<sub>VIM</sub> type (n=25), bla<sub>IMP</sub> type (n=12), bla<sub>OXA-48</sub> type (n=15), bla<sub>OXA-23</sub> type (n=6) and other bla<sub>OXA</sub> type (n=6), with 3 of 89 strains carrying two carbapenemase genes. 40 strains

had decreased carbapenem susceptibility due to non-carbapenemase based mechanisms such as ESBL, AmpC and/or decreased membrane permeability. (ii), In a second collection a total of 152 isolates sent to the NRL for analysis of decreased carbapenem susceptibility in an entire half-month period (Jan, 21<sup>st</sup> to Feb, 6<sup>th</sup> 2013) were analyzed in a blinded study setup. Isolates were tested at the NRL as described above and in parallel analyzed with the here described assay. The blinding was lifted only after completion of the investigation, compared to the NRL data and discrepant results were analyzed on new isolates once. 65/152 (42.8%) of the isolates harbored carbapenemase genes.

**Table S1**

Primers for the detection of carbapenemase resistance genes

| target              | primer  | sequence (5'-3')              | amplicon size [bp] | reference       |
|---------------------|---------|-------------------------------|--------------------|-----------------|
| <b>16S rRNA</b>     | 16S-fw  | TGG AGC ATG TGG TTT AAT TCG A | 159                | <i>In-house</i> |
|                     | 16S-rv  | TGC GGG ACT TAA CCC AAC A     |                    |                 |
| <b>KPC</b>          | KPC-fw  | ATG TCA CTG TAT CGC CGT CT    | 893                | (11)            |
|                     | KPC-rv  | TTT TCA GAG CCT TAC TGC CC    |                    |                 |
| <b>GES</b>          | GES-C   | GTT TTG CAA TGT GCT CAA CG    | 371                | (12)            |
|                     | GES-D   | TGC CAT AGC AAT AGG CGT AG    |                    |                 |
| <b>IMP-1</b>        | IMP-1F  | TGA GCA AGT TAT CTG TAT TC    | 740                | (13)            |
|                     | IMP-1R  | TTA GTT GCT TGG TTT TGA TG    |                    |                 |
| <b>IMP-2</b>        | IMP-2F  | GGC AGT CGC CCT AAA ACA AA    | 737                | (13)            |
|                     | IMP-2R  | TAG TTA CTT GGC TGT GAT GG    |                    |                 |
| <b>VIM-1</b>        | VIM-1F  | TTA TGG AGC AGC AAC CGA TGT   | 920                | (13)            |
|                     | VIM-1R  | CAA AAG TCC CGC TCC AAC GA    |                    |                 |
| <b>VIM-2</b>        | VIM-2F  | AAA GTT ATG CCG CAC TCA CC    | 865                | (13)            |
|                     | VIM-2R  | TGC AAC TTC ATG TTA TGC CG    |                    |                 |
| <b>OXA-48(like)</b> | OXA-48A | TTG GTG GCA TCG ATT ATC GG    | 744                | (7)             |
|                     | OXA-48B | GAG CAC TTC TTT TGT GAT GGC   |                    |                 |
| <b>NDM</b>          | NDM-A   | TCG ATC CCA ACG GTG ATA TT    | 287                | <i>In-house</i> |
|                     | NDM-B   | TGG ATC AAG CAG GAG ATC AA    |                    |                 |
| <b>OXA-23(like)</b> | OXA-23f | GAT CGG ATT GGA GAA CCA GA    | 501                | (8)             |
|                     | OXA-23r | ATT TCT GAC CGC ATT TCC AT    |                    |                 |

**Table S2**

Assay performance for detection of different carbapenemases on a reference collection

| carbapenemase type              | β-lactamase NRL result | No.       | Species                                                              | melt temp. (T <sub>m</sub> )<br>in mastermix<br>(1) or (2) | BD MAX result  | comparison to NRL <sup>1</sup> |                    |
|---------------------------------|------------------------|-----------|----------------------------------------------------------------------|------------------------------------------------------------|----------------|--------------------------------|--------------------|
|                                 |                        |           |                                                                      |                                                            |                | concordant                     | discordant         |
| <b>KPC-type</b>                 | KPC-2                  | 5         | klpn(3), esco(1), kloxo(1)                                           | 92.8-93.5 (1)                                              | KPC            | 5                              |                    |
|                                 | KPC-3                  | 5         | klpn(3), esco(1), kloxo(1)                                           | 92.2-93.6 (1)                                              | KPC            | 5                              |                    |
| <b>GES-type</b>                 | GES-1                  | 1         | psae                                                                 | 89.3 (1)                                                   | GES            | 1                              |                    |
|                                 | GES-5                  | 1         | psae                                                                 | 89.5 (1)                                                   | GES            | 1                              |                    |
|                                 | GES-11                 | 1         | acba                                                                 | 89.8 (1)                                                   | GES            | 1                              |                    |
|                                 | GES-20                 | 1         | psae                                                                 | 89.5 (1)                                                   | GES            | 1                              |                    |
| <b>NDM-type</b>                 | NDM-1/-6               | 9         | klpn(3), esco(3), encl(1),<br>prmi(1), acba(1)                       | 92.6-94.1 (2)                                              | NDM            | 9                              |                    |
|                                 | NDM-2                  | 1         | acba                                                                 | 92.6 (2)                                                   | NDM            | 1                              |                    |
|                                 | NDM-3                  | 1         | esco                                                                 | 92.3 (2)                                                   | NDM            | 1                              |                    |
| <b>VIM-type</b>                 | VIM-1                  | 11        | klpn(2), kloxo(2), sema(1),<br>esco(1), cifr(1), encl(3),<br>psae(1) | 90.5-92.2 (2)                                              | VIM-1          | 11                             |                    |
|                                 | VIM-2                  | 8         | klpn(1), psae(6), kloxo(1)                                           | 90.5-92.2 (1)                                              | VIM-2          | 8                              |                    |
|                                 | VIM-4                  | 1         | encl                                                                 | 90.4 (2)                                                   | VIM-1          | 1                              |                    |
|                                 | VIM-5                  | 1         | psae                                                                 | 90.5 (2)                                                   | VIM-1          | 1                              |                    |
|                                 | VIM-19                 | 1         | klpn                                                                 | 90.1 (2)                                                   | VIM-1          | 1                              |                    |
|                                 | VIM-28                 | 1         | psae                                                                 | 90.8 (2)                                                   | VIM-1          | 1                              |                    |
|                                 | <b>IMP-type</b>        | IMP-1     | 1                                                                    | psae                                                       | 84.7 (1)       | IMP-1                          |                    |
| IMP-2/-19                       |                        | 1         | psae                                                                 | 84.9 (1)                                                   | IMP-2          | 1                              |                    |
| IMP-4/-28                       |                        | 1         | encl                                                                 |                                                            |                |                                | 1                  |
| IMP-7                           |                        | 2         | psae(2)                                                              |                                                            |                |                                | 2                  |
| IMP-8/-24                       |                        | 3         | psae(3)                                                              |                                                            |                |                                | 3                  |
| IMP-13                          |                        | 1         | sema                                                                 |                                                            |                |                                | 1                  |
| IMP-14                          |                        | 1         | encl                                                                 |                                                            |                |                                | 1                  |
| IMP-15                          |                        | 1         | psae                                                                 | 84.4 (1)                                                   | IMP-2          | 1                              |                    |
| IMP-16                          | 1                      | psae      | 85.3 (1)                                                             | IMP-2                                                      | 1              |                                |                    |
| <b>OXA-type</b>                 | OXA-48                 | 14        | esco(2), klpn(7), enae(1),<br>cifr(1), sema(1), kloxo(1),<br>encl(1) | 86.2-88.8 (2)                                              | OXA-48         | 14                             |                    |
|                                 | OXA-162                | 3         | cifr(1), esco(1), klpn(1)                                            | 86.2-86.3 (2)                                              | OXA-48         | 3                              |                    |
|                                 | OXA-181                | 2         | esco(1), klpn(1)                                                     | 86.7; 87.6 (2)                                             | OXA-48         | 2                              |                    |
|                                 | OXA-204                | 1         | klpn                                                                 | 86.5 (2)                                                   | OXA-48         | 1                              |                    |
|                                 | OXA-23                 | 6         | acba(6)                                                              | 84.2-85.0 (2)                                              | OXA-23         | 6                              |                    |
| <b>multiple</b>                 | KPC-2, VIM-1           | 1         | klpn                                                                 | 92.9 (1);<br>90.4 (2)                                      | KPC,<br>VIM-1  | 1                              |                    |
|                                 | KPC-2, VIM-26          | 1         | klpn                                                                 | 93.1 (1);<br>90.2 (2)                                      | KPC,<br>VIM-1  | 1                              |                    |
|                                 | NDM-1/-6,<br>OXA-48    | 1         | klpn                                                                 | 92.4 (2);<br>86.1 (2)                                      | NDM,<br>OXA-48 | 1                              |                    |
| <b>Total (positive strains)</b> |                        | <b>89</b> |                                                                      |                                                            |                | <b>81</b><br>(91.0%)           | <b>8</b><br>(9.0%) |
| <b>No carbapenemase</b>         | negative               | 40        |                                                                      |                                                            | negative       | 40                             | 0                  |

acba, *Acinetobacter baumannii*; cifr, *Citrobacter freundii* enae, *Enterobacter aerogenes*; encl, *Enterobacter cloacae*; esco, *Escherichia coli*; kloxo, *Klebsiella oxytoca*; klpn, *Klebsiella pneumoniae*; prmi, *Proteus mirabilis*; psae, *Pseudomonas aeruginosa*; sema, *Serratia marcescens*

<sup>1</sup> 9 strains had to be tested twice due to mix-up or contamination.

## References

1. **CLSI.** 2010. Performance Standards for Antimicrobial Susceptibility Testing: 20th Informational Supplement M100-S20. Wayne, PA, USA.
2. **Pitout JD, Gregson DB, Poirel L, McClure JA, Le P, Church DL.** 2005. Detection of *Pseudomonas aeruginosa* producing metallo-beta-lactamases in a large centralized laboratory. *J Clin Microbiol.* **43**:3129-3135.
3. **Pasteran F, Mendez T, Guerriero L, Rapoport M, Corso A.** 2009. Sensitive screening tests for suspected class A carbapenemase production in species of Enterobacteriaceae. *J Clin Microbiol.* **47**:1631-1639.
4. **Giske CG, Gezelius L, Samuelsen O, Warner M, Sundsfjord A, Woodford N.** 2011. A sensitive and specific phenotypic assay for detection of metallo-beta-lactamases and KPC in *Klebsiella pneumoniae* with the use of meropenem disks supplemented with aminophenylboronic acid, dipicolinic acid and cloxacillin. *Clin Microbiol Infect.* **17**:552-556.
5. **Yigit H, Queenan AM, Anderson GJ, Domenech-Sanchez A, Biddle JW, Steward CD, Alberti S, Bush K, Tenover FC.** 2001. Novel carbapenem-hydrolyzing beta-lactamase, KPC-1, from a carbapenem-resistant strain of *Klebsiella pneumoniae*. *Antimicrob Agents Chemother.* **45**:1151-1161.
6. **Dallenne C, Da Costa A, Decre D, Favier C, Arlet G.** 2010. Development of a set of multiplex PCR assays for the detection of genes encoding important beta-lactamases in Enterobacteriaceae. *J Antimicrob Chemother.* **65**:490-495.
7. **Poirel L, Heritier C, Tolun V, Nordmann P.** 2004. Emergence of oxacillinase-mediated resistance to imipenem in *Klebsiella pneumoniae*. *Antimicrob Agents Chemother.* **48**:15-22.
8. **Woodford N, Ellington MJ, Coelho JM, Turton JF, Ward ME, Brown S, Amyes SG, Livermore DM.** 2006. Multiplex PCR for genes encoding prevalent OXA carbapenemases in *Acinetobacter* spp. *Int J Antimicrob Agents.* **27**:351-353.
9. **Kaase M, Szabados F, Pfennigwerth N, Anders A, Geis G, Pranada AB, Rossler S, Lang U, Gatermann SG.** 2014. Description of the metallo-beta-lactamase GIM-1 in *Acinetobacter pittii*. *J Antimicrob Chemother.* **69**:81-84.
10. **Marchiaro P, Mussi MA, Ballerini V, Pasteran F, Viale AM, Vila AJ, Limansky AS.** 2005. Sensitive EDTA-based microbiological assays for detection of metallo-{beta}-lactamases in nonfermentative gram-negative bacteria. *J Clin Microbiol.* **43**:5648-5652.
11. **Bradford PA, Bratu S, Urban C, Visalli M, Mariano N, Landman D, Rahal JJ, Brooks S, Cebular S, Quale J.** 2004. Emergence of carbapenem-resistant *Klebsiella* species possessing the class A carbapenem-hydrolyzing KPC-2 and inhibitor-resistant TEM-30 beta-lactamases in New York City. *Clin Infect Dis.* **39**:55-60.
12. **Weldhagen GF, Prinsloo A.** 2004. Molecular detection of GES-2 extended spectrum Beta-lactamase producing *Pseudomonas aeruginosa* in Pretoria, South Africa. *Int J Antimicrob Agents.* **24**:35-38.
13. **Yan JJ, Hsueh PR, Ko WC, Luh KT, Tsai SH, Wu HM, Wu JJ.** 2001. Metallo-beta-lactamases in clinical *Pseudomonas* isolates in Taiwan and identification of VIM-3, a novel variant of the VIM-2 enzyme. *Antimicrob Agents Chemother.* **45**:2224-2228.
